# Supplementary material
Source: ML conference proceedings conference paper supplement (https://proceedings.neurips.cc/paper_files/paper/2020/hash/a7d8ae4569120b5bec12e7b6e9648b86-Abstract.html)
Supplement: Supplementary file [file a7d8ae4569120b5bec12e7b6e9648b86-Supplemental.zip]

# Supplement to “The Strong Screening Rule for SLOPE”

Johan Larsson<sup>1,\*</sup>, Małgorzata Bogdan<sup>1,2</sup>, and Jonas Wallin<sup>1</sup>

<sup>1</sup>*Department of Statistics, Lund University*

<sup>2</sup>*Department of Mathematics, University of Wrocław*

\*Corresponding author: [johan.larsson@stat.lu.se](mailto:johan.larsson@stat.lu.se)

October 21, 2020

## 1 Proofs

### 1.1 Proof of Theorem 1

By definition, the subdifferential  $\partial J(\beta; \lambda)$  is the set of all  $g \in \mathbb{R}^p$  such that

$$J(y; \lambda) \geq J(\beta; \lambda) + g^T(y - \beta) = \sum_{j=1}^p |\beta|_{(j)} \lambda_j + g^T(y - \beta), \quad (1)$$

for all  $y \in \mathbb{R}^p$ .

Assume that we have  $K$  clusters  $\mathcal{A}_1, \mathcal{A}_2, \dots, \mathcal{A}_K$  (as defined per Equation 2 (main article)) and that  $\beta = |\beta|_{\downarrow}$ , which means we can rewrite (1) as

$$\begin{aligned} 0 &\geq J(\beta; \lambda) - J(y; \lambda) + g^T(y - \beta) \\ &= \sum_{i \in \mathcal{A}_1} (\lambda_i |\beta|_{(i)} - g_i \beta_i - \lambda_i |y|_{(i)} + g_i y_i) + \dots \\ &\quad + \sum_{i \in \mathcal{A}_K} (\lambda_i |\beta|_{(i)} - g_i \beta_i - \lambda_i |y|_{(i)} + g_i y_i). \end{aligned}$$

Notice that we must have  $\sum_{i \in \mathcal{A}_j} (\lambda_i |\beta|_{(i)} - g_i \beta_i - \lambda_i |y|_{(i)} + g_i y_i) \leq 0$  for all  $j \in \{1, 2, \dots, K\}$  since otherwise the inequality breaks by selecting  $y_i = \beta_i$  for  $i \in \mathcal{A}_j^c$ . This means that it is sufficient to restrict attention to a single set as well as take this to be the set  $\mathcal{A}_i = \{1, \dots, p\}$ .

*Case 1* ( $\beta = \mathbf{0}$ ). In this case (1) reduces to  $J(y; \lambda) \geq g^T y$ . Now take a  $c \in \mathcal{Z}$  where

$$\mathcal{Z} = \{s \in \mathbb{R}^p \mid \text{cumsum}(|s|_{\downarrow} - \lambda) \preceq \mathbf{0}\} \quad (2)$$

and assume that  $|c_1| \geq \dots \geq |c_p|$  without loss of generality.

Clearly,  $J(y; \lambda) \geq c^T y$  holds if and only if  $J(y^*; \lambda) - c^T y^* \geq 0$  where

$$y^* = \arg \min_y \{J(y; \lambda) - c^T y\}.$$

Now, since  $J(y; \lambda)$  is invariant to changes in signs and permutation of  $y$ , it follows from the rearrangement inequality [HLP52, Theorem 368] that  $|y|_1^* \geq \dots \geq |y|_p^*$ . This permits us to formulate the following equivalent problem:

$$\begin{aligned} & \text{minimize} && y^T (\text{sign}(y) \odot \lambda - c) \\ & \text{subject to} && \text{sign}(y) = \text{sign}(c), \\ & && |y_1| \geq \dots \geq |y_p|. \end{aligned}$$

To minimize the objective  $y^T (\text{sign}(y) \odot \lambda - c) = |y|^T (\lambda - |c|)$ , recognize first that we must have  $y_1^* = y_2^*$  since  $c \in \mathcal{Z}$ , which implies  $\lambda_1 - |c_1| \geq 0$ . Likewise,  $y_2^* (\lambda_1 - |c_1|) + y_2^* (\lambda_2 - |c_2|) \geq 0$  since  $\lambda_1 + \lambda_2 - (|c_1| + |c_2|) \geq 0$ , which leads us to conclude that  $y_2^* = y_3^*$ . Then, proceeding inductively, it is easy to see that  $y_p^* \sum_{i=1}^p (\lambda_i - |c_i|) \geq 0$ , which implies  $y_1^* = \dots = y_p^* = 0$ . At this point, we have shown that  $c \in \mathcal{Z} \implies c \in \partial J(\beta; \lambda)$ .

For the next part note that  $g \in \mathcal{Z}$  is equivalent to requiring  $|g|_{(1)} \leq \lambda_1$  and

$$|g|_{(i)} \leq \sum_{j=1}^i \lambda_j - \sum_{j=2}^i |g|_{(j)}, \quad i = 1, \dots, p. \quad (3)$$

Now assume that there is a  $c$  such that  $c \in \partial J(\beta; \lambda)$  and  $c \notin \mathcal{Z}$ . Then there exists an  $\varepsilon > 0$  and  $i \in \{1, 2, \dots, p\}$  such that

$$|c|_{(i)} \leq \sum_{j=1}^i \lambda_j - \sum_{j=2}^i |c|_{(j)} + \varepsilon, \quad i = 1, \dots, p.$$

Yet if  $c = [\lambda_1, \dots, \lambda_{i-1}, \lambda_i + \varepsilon, \lambda_{i+1}, \dots, \lambda_p]^T$  then (1) breaks for  $y = \mathbf{1}$ , which implies that  $c \notin \mathcal{Z} \implies c \notin \partial J(\beta; \lambda)$ .

*Case 2* ( $\beta \neq \mathbf{0}$ ). Now let  $|\beta_i| := \alpha$  for all  $i = 1, \dots, p$ , since by construction all  $\beta$  are equal in absolute value. Now (1) reduces to

$$\begin{aligned} J(y; \lambda) & \geq J(\beta; \lambda) - g^T \beta + g^T y \\ & = \sum_{i=1}^p \lambda_i \alpha - \sum_{i=1}^p g_i \text{sign}(\beta_i) \alpha + g^T y \\ & = \alpha \sum_{i=1}^p (\lambda_i - g_i \text{sign}(\beta_i)) + g^T y. \end{aligned} \quad (4)$$

The first term on the right-hand side of the last equality must be zero since otherwise the inequality breaks for  $y = \mathbf{0}$ . In addition, it must also hold that  $\text{sign}(\beta_i) = \text{sign}(g_i)$  for all  $i$  such that  $|\beta_i| > 0$ . To show this, suppose the opposite

is true, that is, there exists at least one  $j$  such that  $\text{sign}(g_j) \neq \text{sign}(\beta_j)$ . But then if we take  $y_j = \alpha \text{sign}(g_j)$  and  $y_i = -\alpha \text{sign}(g_i)$ , (4) is violated, which proves the statement by contradiction.

Taken together, this means that we have  $g \in \mathcal{H}$  where

$$\mathcal{H} = \left\{ s \in \mathbb{R}^p \mid \sum_{j=1}^p (|s_j| - \lambda_j) = 0. \right\}$$

We are now left with  $J(y; \lambda) \geq g^T y$ , but this is exactly the setting from case one. Direct application of the reasoning from that part shows that we must have  $g \in \mathcal{Z}$ . Connecting the dots, we finally conclude that  $c \in \mathcal{Z} \cap \mathcal{H} \implies c \in \partial J(\beta; \lambda)$ .

## 1.2 Proof of Proposition 1

Suppose that we have  $\mathcal{B} \neq \emptyset$  after running Algorithm 1 (main article). In this case we have

$$\text{cumsum}(c_{\mathcal{B}} - \lambda_{\mathcal{B}}) = \text{cumsum} \left( \left( |\nabla f(\hat{\beta}(\lambda^{(m+1)}))|_{\downarrow} \right)_{\mathcal{B}} - \lambda_{\mathcal{B}}^{(m+1)} \right) \prec \mathbf{0},$$

which implies via Theorem 1 (main article) and Equation 3 (main article) that all predictors in  $\mathcal{B}$  must be inactive and that  $\mathcal{S}$  contains the true support set.

## 1.3 Proof of Proposition 2

We need to show that the strong rule approximation does not violate the inequality on the fourth line in Algorithm 1 (main article). Since  $\text{cumsum}(y) \succeq \text{cumsum}(x)$  for all  $x, y \in \mathbb{R}^p$  if and only iff  $y \succeq x$ , it suffices to show that

$$|c_j(\lambda^{(m)})| + \lambda_j^{(m)} - \lambda_j^{(m+1)} \geq |c_j(\lambda^{(m+1)})|$$

for all  $j = 1, 2, \dots, p$ , which in turn means that Algorithm 1 (main article) with  $|c_j(\lambda^{(m)})| + \lambda_j^{(m)} - \lambda_j^{(m+1)}$  as input cannot result in any violations.

From our assumptions we have

$$|c_j(\lambda^{(m+1)}) - c_j(\lambda^{(m)})| \leq |\lambda_j^{(m+1)} - \lambda_j^{(m)}|.$$

Using this fact, observe that

$$\begin{aligned} |c_j(\lambda^{(m+1)})| &\leq |c_j(\lambda^{(m+1)}) - c_j(\lambda^{(m)})| + |c_j(\lambda^{(m)})| \\ &\leq \lambda_j^{(m)} - \lambda_j^{(m+1)} + |c_j(\lambda^{(m)})|. \end{aligned}$$

## 1.4 Proof of Proposition 3

Let  $c = (\nabla f(\hat{\beta}(\lambda)))$  and  $\lambda_1 = \lambda_2$  and assume without loss of generality that  $p = 2$  and  $c_1 \geq c_2 \geq 0$ . Recall that the strong rule for lasso discards the  $j$ th predictor whenever  $c_j < \lambda_1$ . There are three cases to consider.

*Case 3* ( $c_2 \leq c_1 < \lambda_1$ ).  $\text{cumsum}(c - \lambda) \prec 0$ , which means both predictors are discarded.

*Case 4* ( $c_1 \geq \lambda_1 > c_2$ ). The first predictor is retained since  $\text{cumsum}(c - \lambda)_1 > 0$ ; the second is discarded because  $c_2 \leq \lambda$ .

*Case 5* ( $c_1 \geq c_2 \geq \lambda_1$ ). Both predictors are retained since  $\text{cumsum}(c - \lambda) \succeq 0$ .

The two results are equivalent for the lasso and thus the strong rule for SLOPE is a generalization of the strong rule for the lasso.

## 2 Algorithms

---

### Algorithm 1 Strong set algorithm

---

```

 $\mathcal{V} \leftarrow \emptyset$ 
 $\mathcal{E} \leftarrow \mathcal{S}(\lambda^{(m+1)}) \cup \mathcal{T}(\lambda^{(m)})$ 
do
  compute  $\hat{\beta}_{\mathcal{E}}(\lambda^{(m+1)})$ 
   $\mathcal{V} \leftarrow$  KKT violations in full set
   $\mathcal{E} \leftarrow \mathcal{E} \cup \mathcal{V}$ 
while  $\mathcal{V} \neq \emptyset$ 
return  $\hat{\beta}_{\mathcal{E}}(\lambda^{(m+1)})$ 

```

---



---

### Algorithm 2 Previous set algorithm

---

```

 $\mathcal{V} \leftarrow \emptyset$ 
 $\mathcal{E} \leftarrow \mathcal{T}(\lambda^{(m)})$ 
do
  compute  $\hat{\beta}_{\mathcal{E}}(\lambda^{(m+1)})$ 
   $\mathcal{V} \leftarrow$  KKT violations in  $\mathcal{S}(\lambda^{(m+1)})$ 
  if  $\mathcal{V} = \emptyset$  then
     $\mathcal{V} \leftarrow$  KKT violations in full set
  end if
   $\mathcal{E} \leftarrow \mathcal{E} \cup \mathcal{V}$ 
while  $\mathcal{V} \neq \emptyset$ 
return  $\hat{\beta}_{\mathcal{E}}(\lambda^{(m+1)})$ 

```

---

## References

- [1] G.H. Hardy, J.E. Littlewood, and G. Pólya. *Inequalities*. Second. Cambridge, United Kingdom: Cambridge University Press, 1952. ISBN: 0-521-05206-8.
