# Supplementary material
Source: ML conference proceedings conference paper supplement (https://proceedings.neurips.cc/paper_files/paper/2020/hash/a7d8ae4569120b5bec12e7b6e9648b86-Abstract.html)

number of predictors

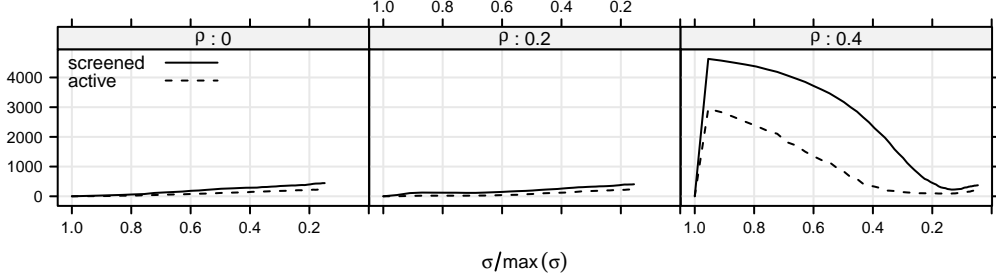

Supplement: Supplementary file [file a7d8ae4569120b5bec12e7b6e9648b86-Supplemental.zip]
